# Supplementary material for: Bacteroides Fragilis in the gut microbiomes of Alzheimer’s disease activates microglia and triggers pathogenesis in neuronal C/EBPβ transgenic mice
Source: PubMed Central journal article supplement (PMC10482867; doi:10.1038/s41467-023-41283-w), 2023-09-06
Supplement: 41467_2023_41283_MOESM1_ESM.pdf [file 41467_2023_41283_MOESM1_ESM.pdf]

1 ***Bacteroides Fragilis* in the gut microbiomes of Alzheimer’s Disease activates microglia and**  
2 **triggers pathogenesis in neuronal C/EBP $\beta$  transgenic mice**

3 **Supplementary Information files**

4 **By**

5 Yiyuan Xia †<sup>1,2</sup>, Yifan Xiao †<sup>2</sup>, Zhihao Wang<sup>1</sup>, Xia Liu<sup>1</sup>, Ashfaqu M. Alam<sup>3</sup>, John P.  
6 Haran<sup>4,5,6</sup>, Beth A. McCormick<sup>5,6</sup>, Xiji Shu<sup>2,\*</sup>, Xiaochuan Wang<sup>7,8,\*</sup>, and Keqiang Ye<sup>1,9,\*</sup>

7

8

9

10 **This file contains Supplementary figures 1-16.**

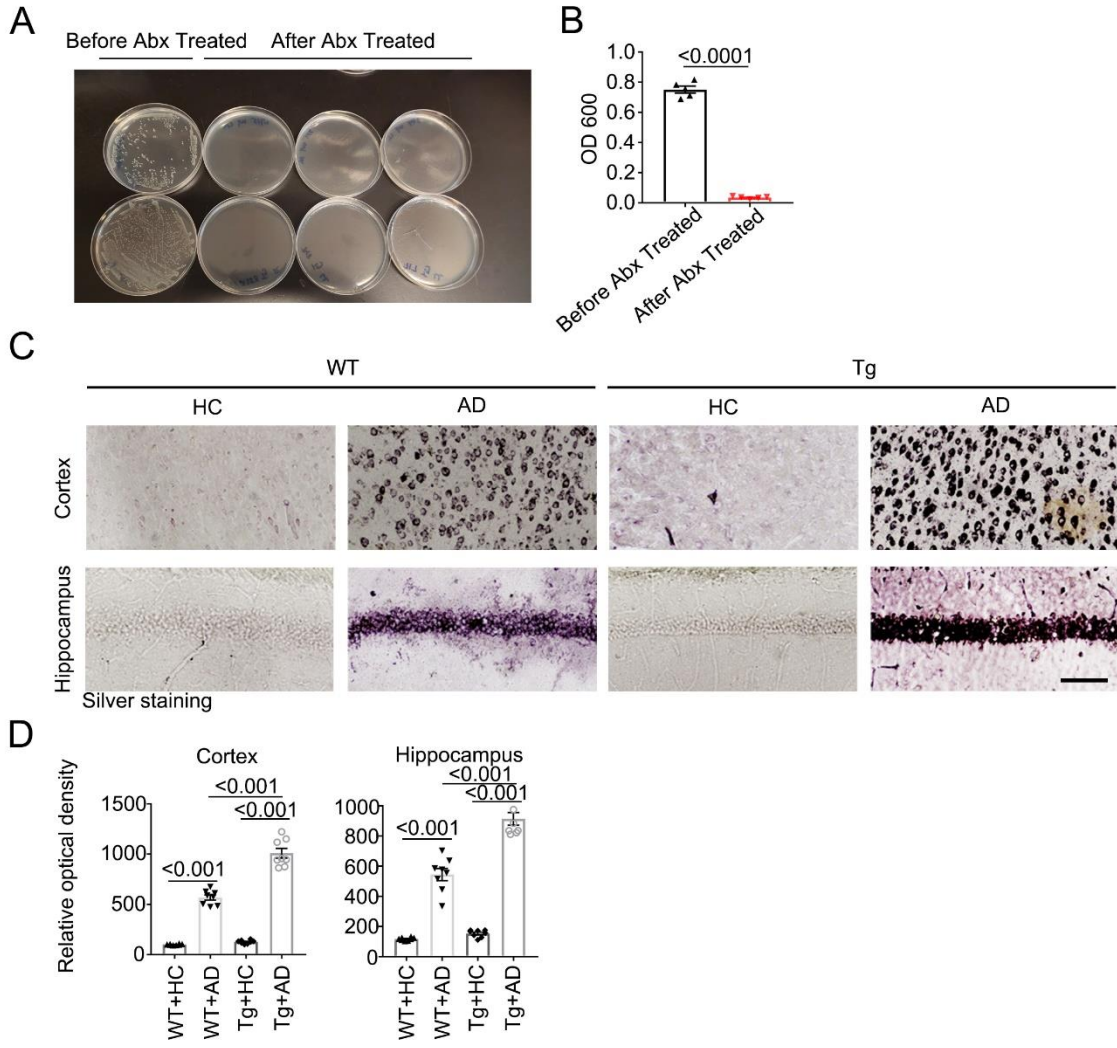

1 **Figure S1. AD humanized Abx-treated mice display increased aggregated proteins and**  
2 **apoptotic neurons compared with HC humanized Abx-treated mice in WT and C/EBP $\beta$  Tg**  
3 **mice.**

4 (A-B) In vitro cultures of bacteria from fecal pellets with/without Abx treated 3-month-old mice,  
5 showed that antibiotics treatment was effective in killing the bacteria. (n = 5 biologically  
6 independent samples in each group, data are shown as mean  $\pm$  SEM, two-tailed Student's t test).

7 (C) Silver staining in the cortex and the hippocampus. Scale bar: 50  $\mu$ m. (D) Quantitative

8 analysis of Silver staining. Aggregated proteins were significantly increased in AD humanized

9 Abx-treated mice. (n = 8 biologically independent samples in each group, data are shown as

10 mean  $\pm$  SEM, one-way ANOVA and Bonferroni's multiple comparison test).

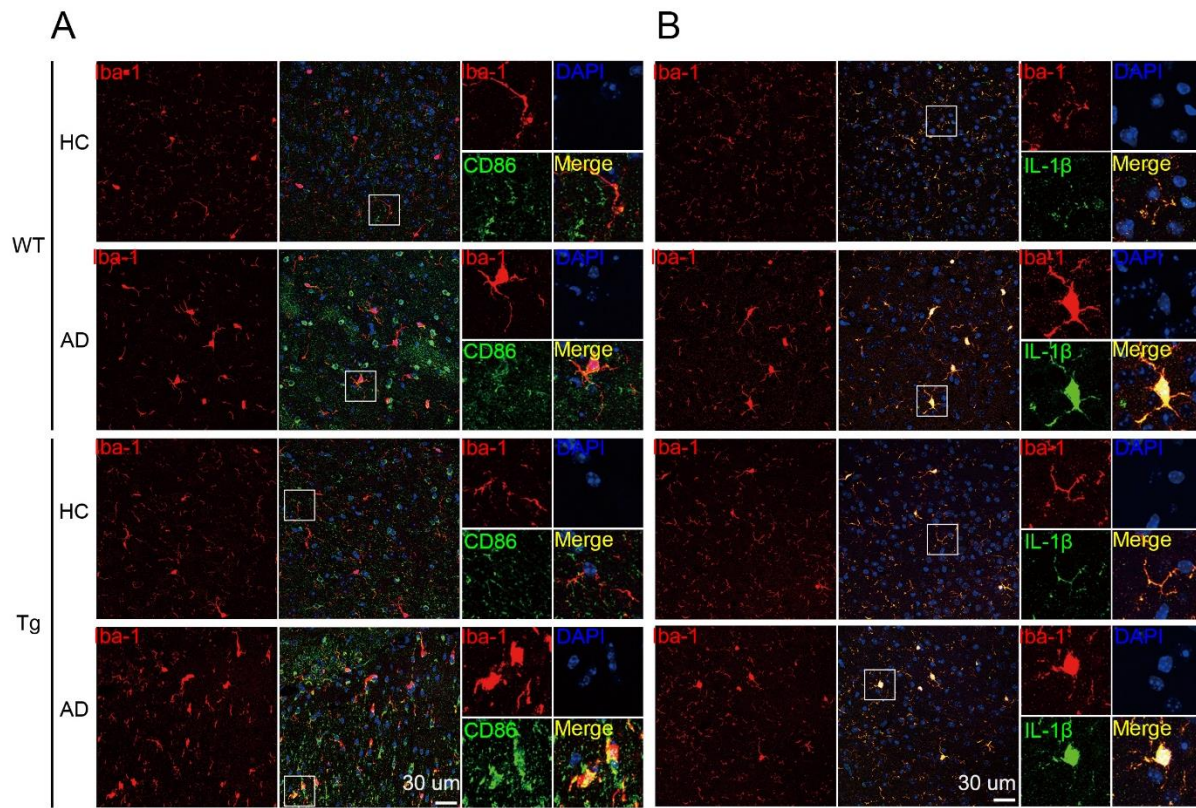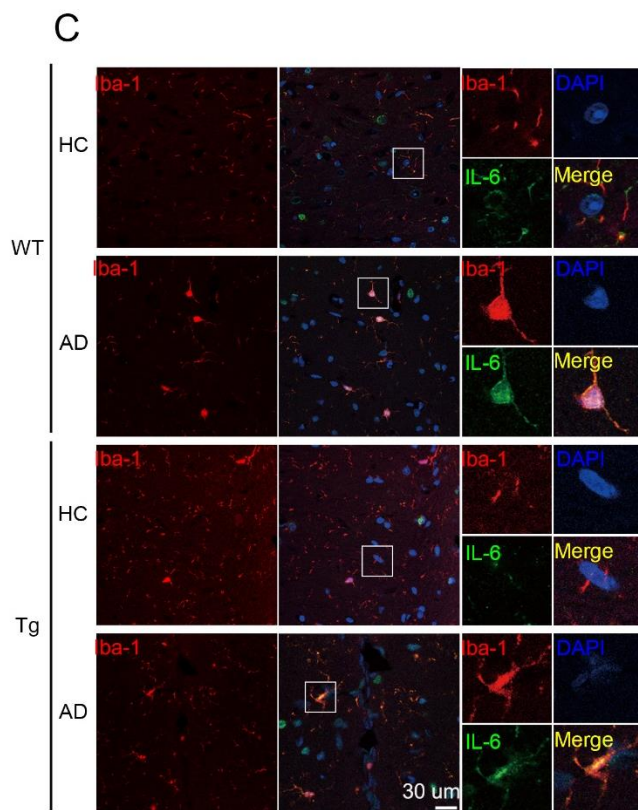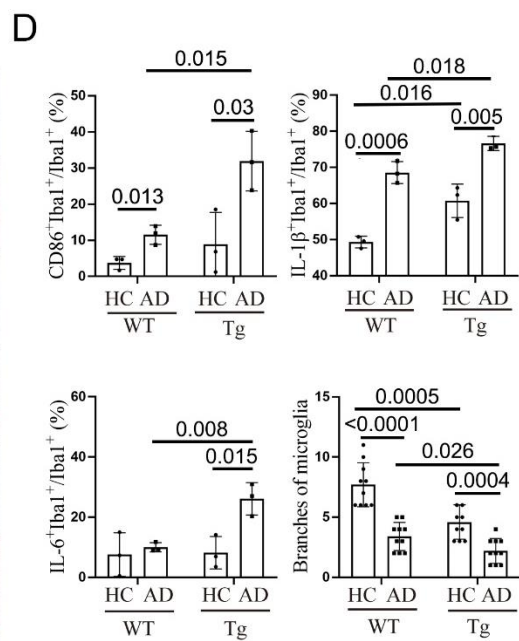

1 **Figure S2. AD humanized Abx-treated mice display increased cytokines in microglia**  
2 **compared with HC humanized Abx-treated mice in WT and C/EBP $\beta$  Tg mice.**  
3 (A) Immunofluorescent staining of Iba-1 (red) and CD86 (green) in the cortex region of the  
4 brains from AD or HC humanized Abx-treated 6-month-old mice. Scale bar: 30  $\mu$ m. (B)  
5 Immunofluorescent staining of Iba-1 (red) and IL-1 $\beta$  (green) in the cortex region of the brains  
6 from AD or HC humanized Abx-treated 6-month-old mice. Scale bar: 30  $\mu$ m. (C)  
7 Immunofluorescent staining of Iba-1 (red) and IL-6 (green) in the cortex region of the brains  
8 from AD or HC humanized Abx-treated 6-month-old mice. Scale bar: 30  $\mu$ m. (D) Quantitative  
9 analysis of Iba-1<sup>+</sup> and CD86<sup>+</sup>/IL-1 $\beta$ <sup>+</sup>/IL-6<sup>+</sup> percentage in Iba-1<sup>+</sup> microglia, and branches of Iba-  
10 1<sup>+</sup> microglia (n = 3 biologically independent samples in each group, data are shown as mean  $\pm$   
11 SEM, one-way ANOVA and Bonferroni's multiple comparison test).

**A**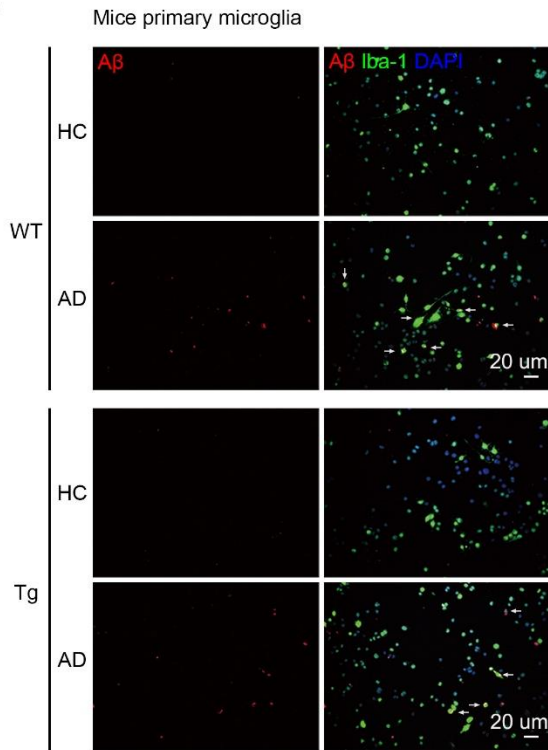**B**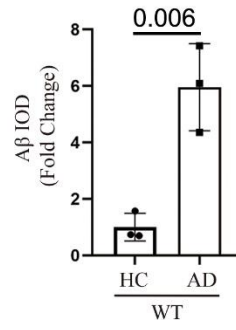**C**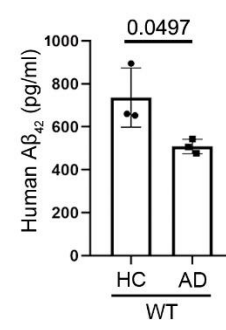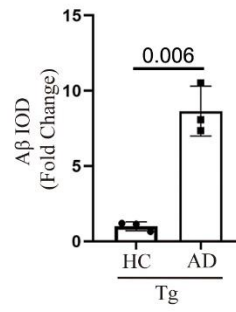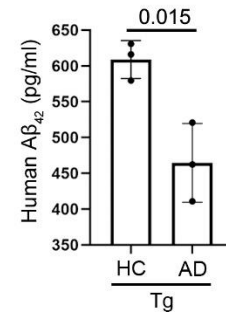

1 **Figure S3. AD humanized Abx-treated mouse primary microglia display better ability to**  
2 **engulf A $\beta$  than HC.**

3 The primary cultures of microglia cells from AD or HC humanized Abx-treated 6-month-old  
4 mice, then treated with human A $\beta_{42}$  fibrils for 24 hours. (A) Immunofluorescent staining of  
5 human A $\beta$  (red) and Iba-1 (green) in the primary cultured microglia cells. Phagocytosed  
6 microglia cells with engulfed A $\beta_{42}$  was designed with white arrows. Scale bar: 20  $\mu$ m. (B)

7 Quantitative analysis A $\beta$  IOD (Integrated optical density) in Iba-1<sup>+</sup> microglia (n = 3 biologically  
8 independent samples in each group, data are shown as mean  $\pm$  SEM, two-tailed Student's t test).

9 (C) Human A $\beta_{42}$  concentration in the medium were detected with ELISA (n = 3 biologically

10 independent samples in each group, data are shown as mean  $\pm$  SEM, two-tailed Student's t test).



**A**  
Rat primary microglia treated with Mice serum

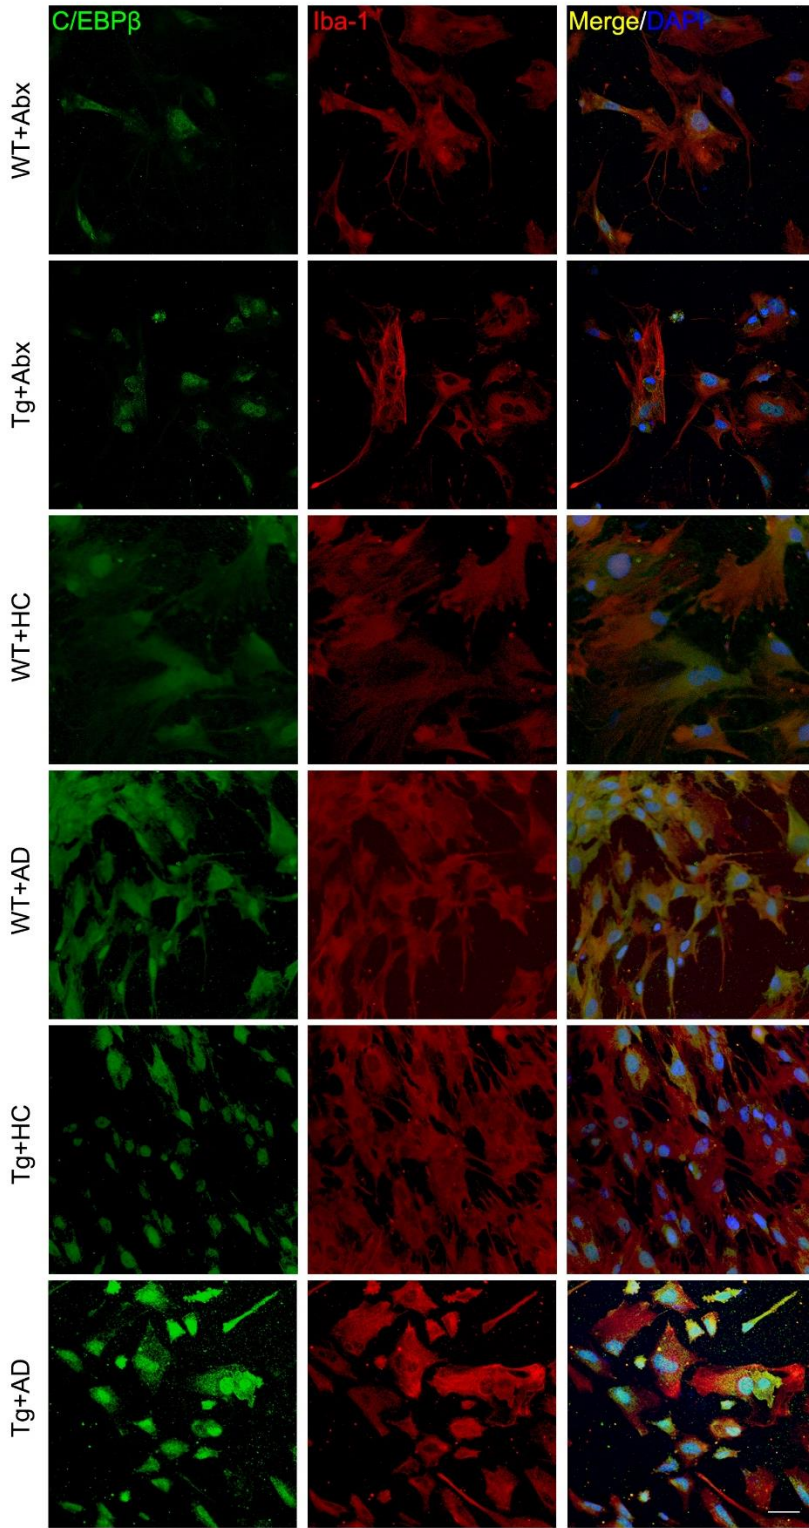

**B**

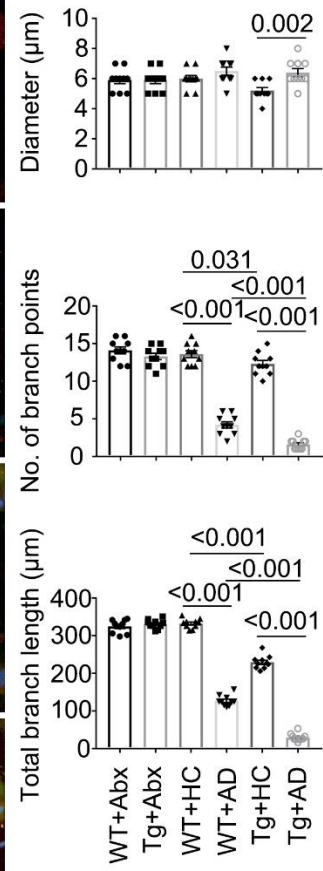



1 **Figure S4. AD humanized Abx-treated mouse serum strongly activated rat primary**  
2 **microglia compared with HC humanized Abx-treated mouse serum.**  
3 (A) Rat primary microglia treated with HC or AD humanized Abx-treated 6-month-old mice  
4 serum (20  $\mu\text{g}/\text{ml}$ ), 24 h later, the microglia were fixed and staining with C/EBP $\beta$  (green) and Iba-  
5 1 (red). Scale bar: 10  $\mu\text{m}$ . (B) Quantitative analysis of diameter, number of branch points, and  
6 total branch length in Iba-1 (red) positive microglia. (n = 10 biologically independent samples in  
7 each group, data are shown as mean  $\pm$  SEM, one-way ANOVA and Bonferroni's multiple  
8 comparison test).

**A**

Rat primary microglia treated with Mice serum

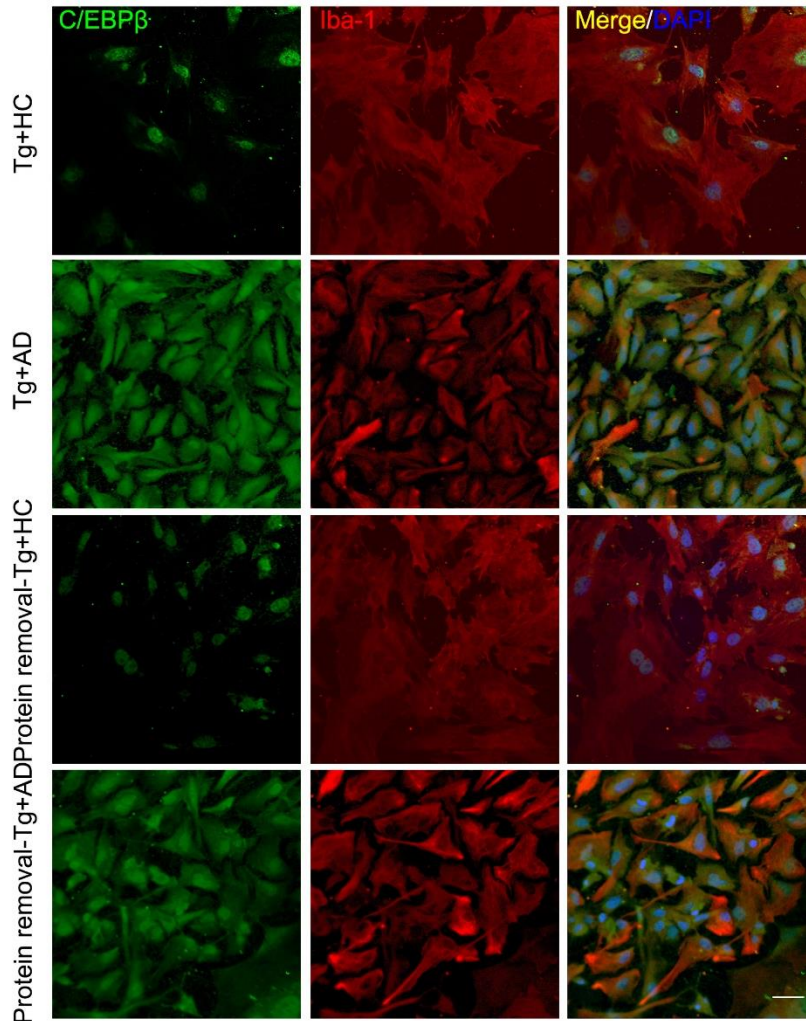

**B**

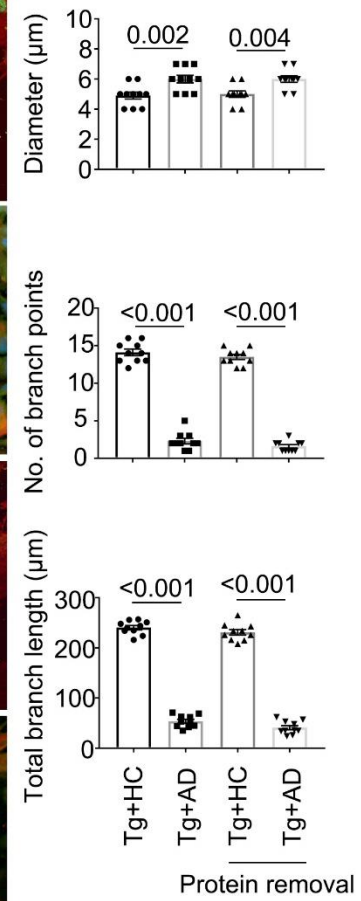

1 **Figure S5. Protein depletion from AD humanized Abx-treated mouse serum did not affect**  
2 **rat primary microglia activation.**

3 (A) Rat primary microglia treated with HC or AD humanized Abx-treated 6-month-old C/EBP $\beta$   
4 Tg mice serum (20  $\mu$ g/ml) or TCA treated protein removal serum, 24 h later, the microglia were  
5 fixed and staining with C/EBP $\beta$  (green) and Iba-1 (red). Scale bar: 10  $\mu$ m. (B) Quantitative  
6 analysis of diameter, number of branch points, and total branch length in Iba-1 (red) positive  
7 microglia. (n = 10 biologically independent samples in each group, data are shown as mean  $\pm$   
8 SEM, one-way ANOVA and Bonferroni's multiple comparison test).

**A**

Rat primary microglia treated with Mice brain lysis

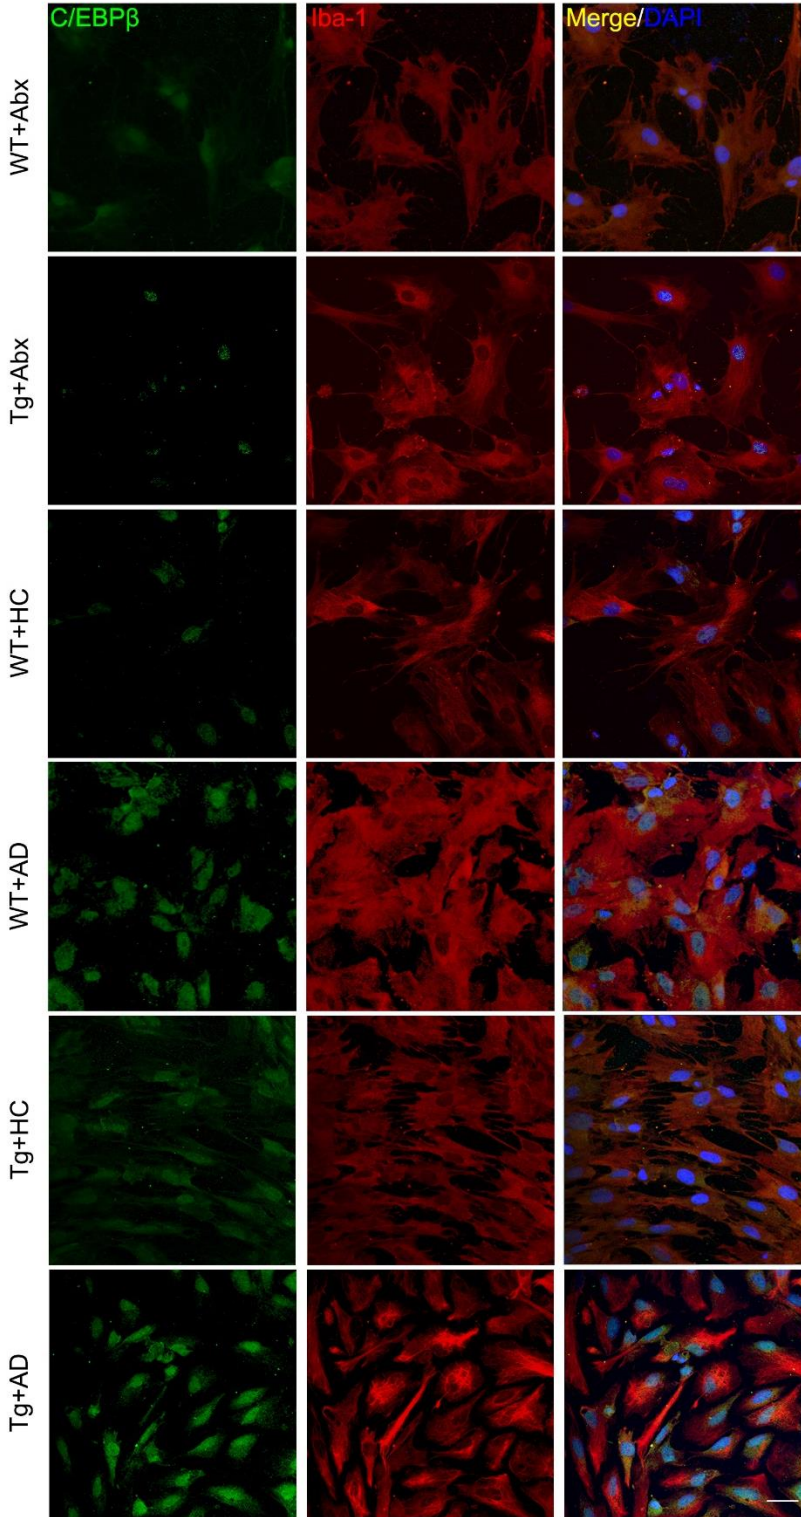

**B**

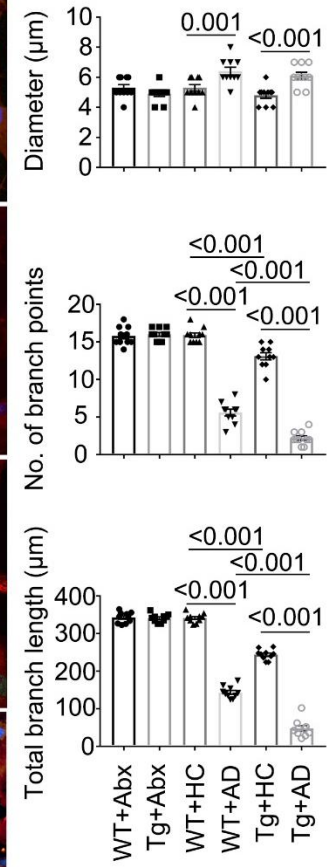

1 **Figure S6. AD humanized Abx-treated mouse brain lysates activated rat primary microglia**  
2 **more robust than HC.**

3 (A) Rat primary microglia treated with HC or AD humanized Abx-treated 6-month-old mice  
4 brain lysis (20 µg/ml), 24 h later, the microglia were fixed and staining with C/EBPβ (green) and  
5 Iba-1 (red). Scale bar: 10 µm. (B) Quantitative analysis of diameter, number of branch points,  
6 and total branch length in Iba-1 (red) positive microglia. n=10 biologically independent samples  
7 in each group, data are shown as mean ± SEM, one-way ANOVA and Bonferroni's multiple  
8 comparison test.

**A**  
Rat primary microglia treated with Mice brain lysis

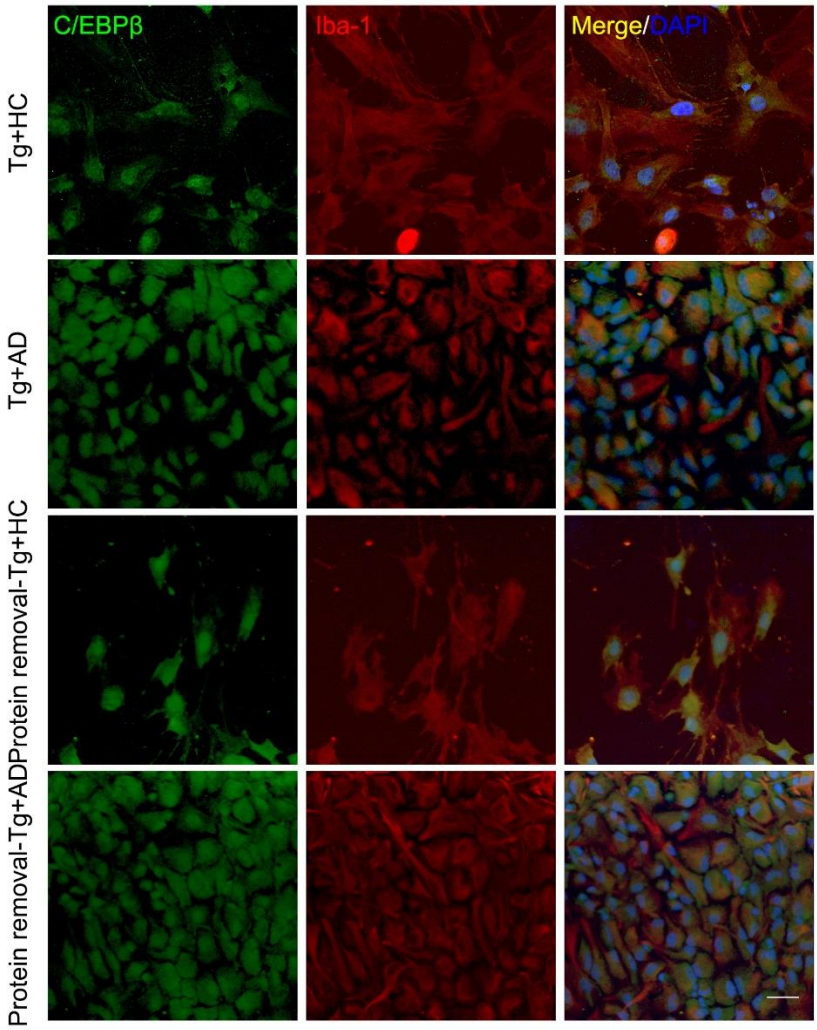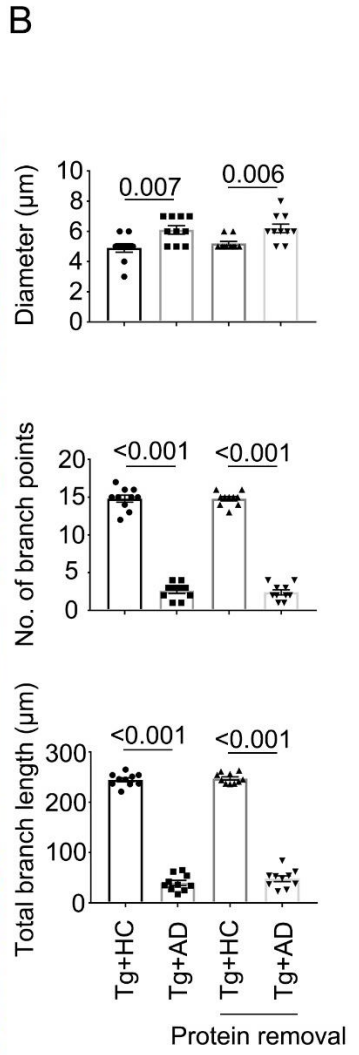



1 **Figure S7. Protein depletion from AD humanized Abx-treated mice brain lysates did not**  
2 **affect rat primary microglia.**

3 (A) Rat primary microglia treated with HC or AD humanized Abx-treated 6-month-old C/EBP $\beta$   
4 Tg mice brain lysis (20  $\mu$ g/ml) or TCA treated protein removal brain lysis, 24 h later, the  
5 microglia were fixed and staining with C/EBP $\beta$  (green) and Iba-1 (red). Scale bar: 10  $\mu$ m. (B)  
6 Quantitative analysis of diameter, number of branch points, and total branch length in Iba-1 (red)  
7 positive microglia. (n = 10 biologically independent samples in each group, data are shown as  
8 mean  $\pm$  SEM, one-way ANOVA and Bonferroni's multiple comparison test).

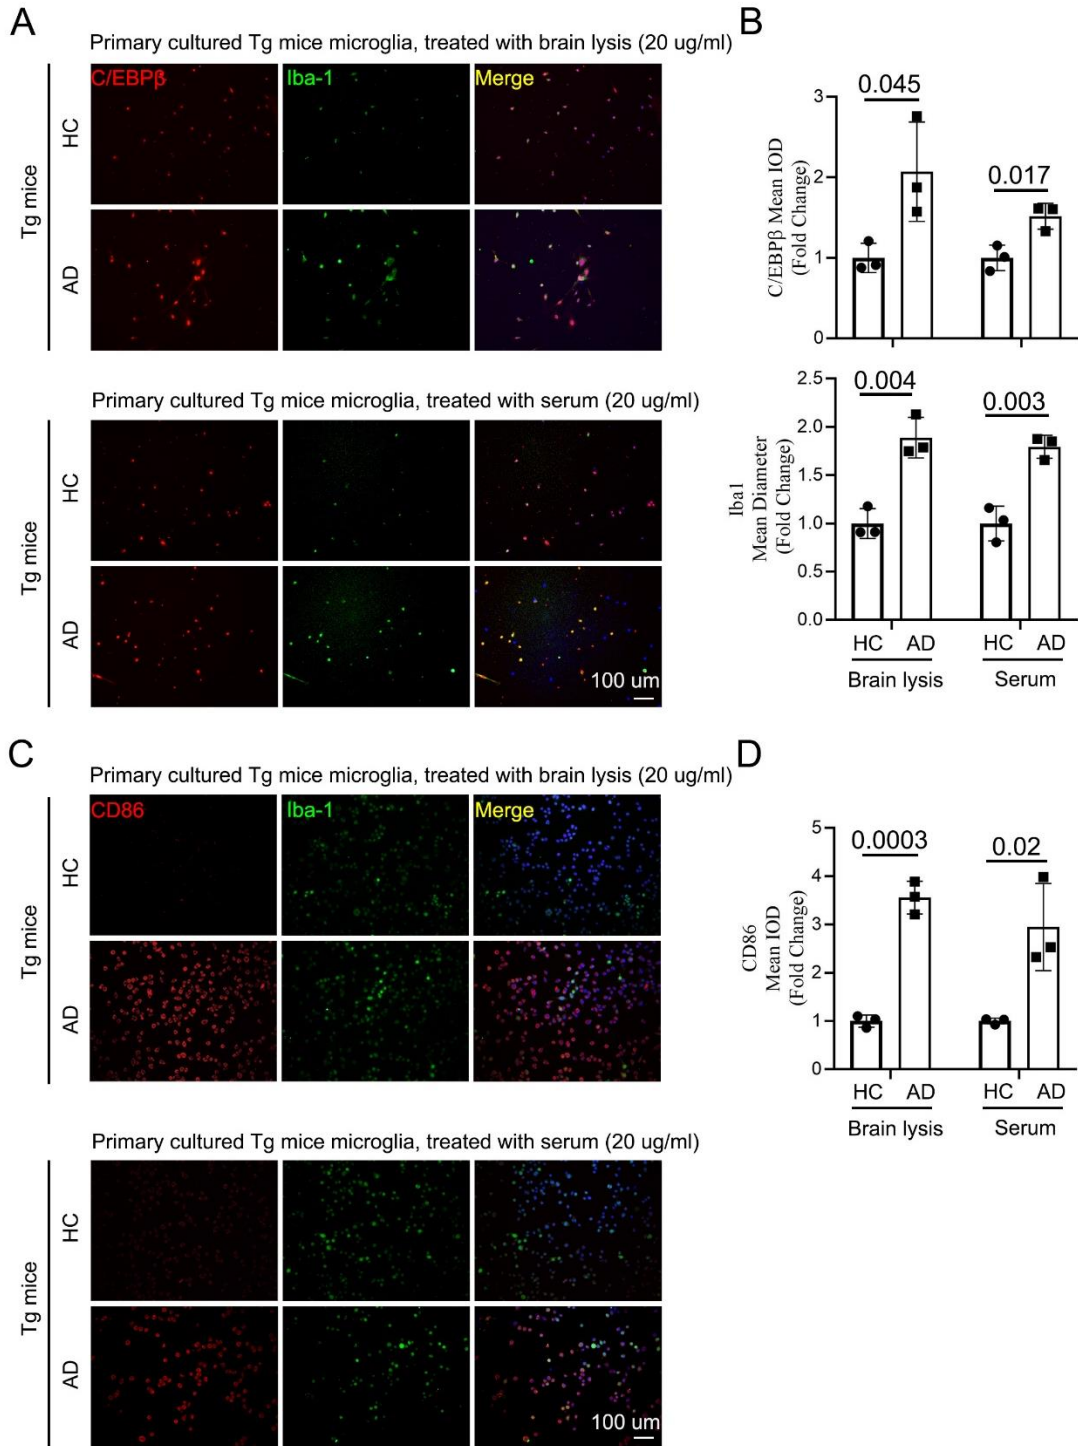

1 **Figure S8. AD humanized Abx-treated mice brain lysates/serum activated Tg mice primary**  
2 **microglia more robust than HC.**

3 The primary cultured microglia from C/EBP $\beta$  Tg mice, treated with HC/AD humanized Abx-  
4 treated 6-month-old mice brain lysis or serum for 24 h. (A) The microglia were fixed and  
5 staining with C/EBP $\beta$  (red) and Iba-1 (green). Scale bar: 100  $\mu$ m. (B) Quantitative analysis of  
6 C/EBP $\beta$  mean IOD and Iba-1<sup>+</sup> microglia soma mean diameter (n = 3 biologically independent  
7 samples in each group, data were shown as mean  $\pm$  SEM, two-tailed Student's t test). (C) The  
8 microglia were fixed and staining with CD86 (red) and Iba-1 (green). Scale bar: 100  $\mu$ m. (D)  
9 Quantitative analysis of CD86 mean IOD (n = 3 biologically independent samples in each group,  
10 data were shown as mean  $\pm$  SEM, two-tailed Student's t test).

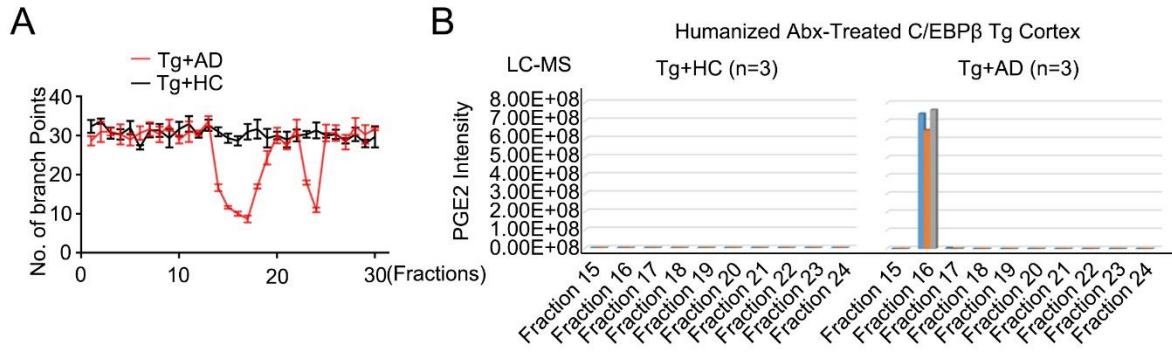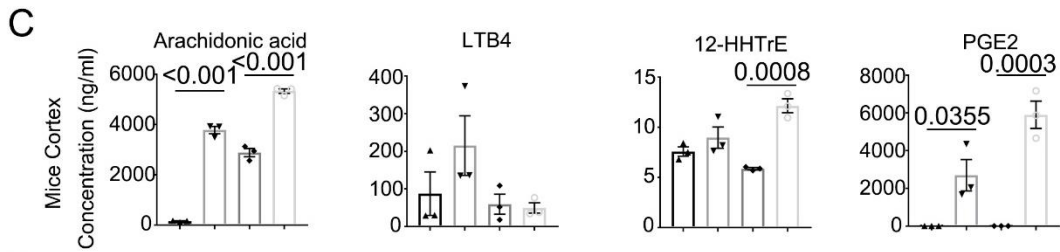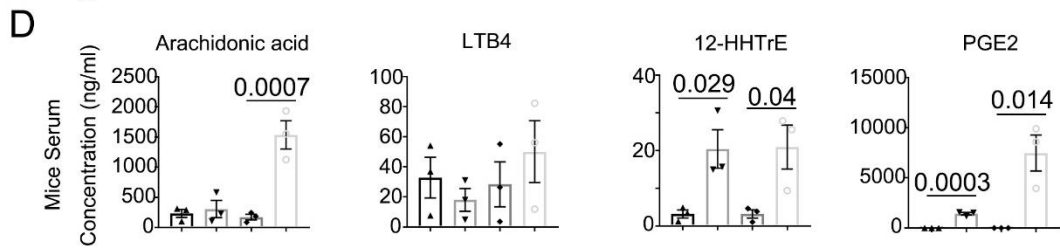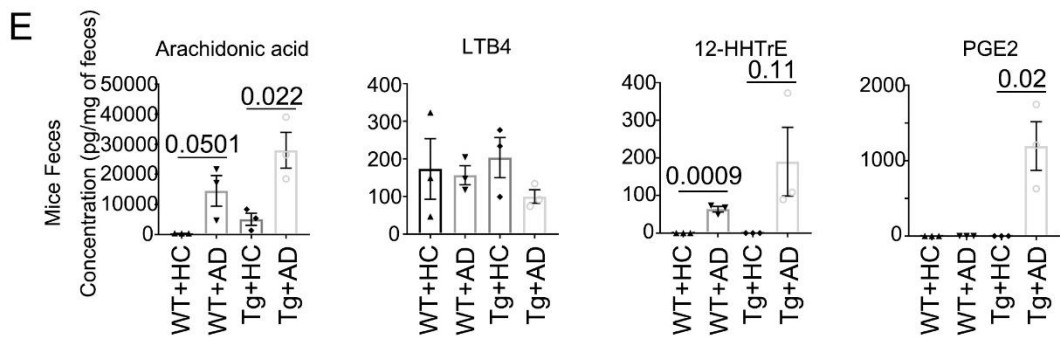

1 **Figure S9. AD humanized Abx-treated mice display increased arachidonic acid, 12-**  
2 **HHTrE, and PGE2 compared with HC.**

3 (A) TCA treated protein removal from HC or AD humanized Abx-treated 6-month-old C/EBP $\beta$   
4 Tg mice brain lysates were separated into 30 fractions with HPLC. 96-well planted rat primary  
5 microglia were treated with each fraction for 10 ul/well. 24 h later, the number of branch points  
6 was counted for the activity of microglia. Only AD humanized Abx-treated C/EBP $\beta$  Tg mice  
7 showed changes in the activity, including fractions 12-20, 22-25. (B) After LC-MS analysis of  
8 fractions 15-24, PGE2 was found increased in AD humanized Abx-treated mice compared with  
9 HC humanized Abx-treated 6-month-old mice. Source data are provided as a Source Data file.  
10 (C-E) HPLC analysis the concentrations of arachidonic acid (AA) and its metabolites in HC or  
11 AD humanized Abx-treated 6-month-old WT or C/EBP $\beta$  Tg mice brain lysis (C), serum (D), and  
12 feces samples (E). (n=3 biologically independent samples in each group, data are shown as mean  
13  $\pm$  SEM, one-way ANOVA and Bonferroni's multiple comparison test).

**A**

Primary cultured Tg mice microglia

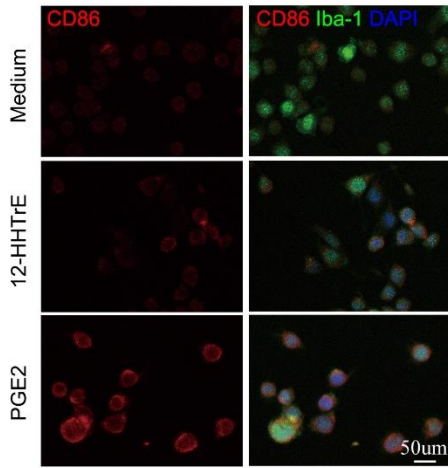**B**

Primary cultured Tg mice neuron

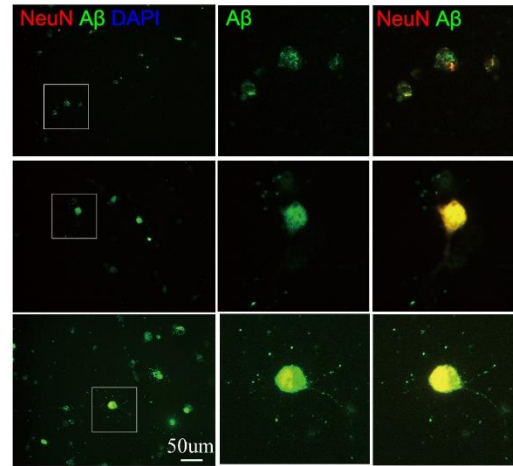**C**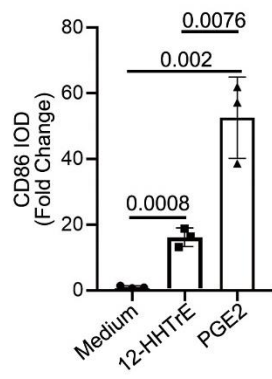**D**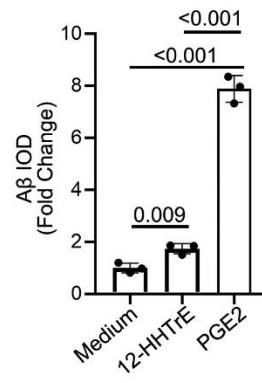



1 **Figure S10. 12-HHTrE and PGE2 enhanced the activation of microglia and neuronal A $\beta$ <sub>42</sub>**  
2 **deposition.**

3 In vitro cultured microglia and neurons from Tg mice were employed for the analysis of  
4 microglia activation and A $\beta$ <sub>42</sub> deposition. (A) The primary cultured microglia from C/EBP $\beta$  Tg  
5 mice, treated with 12-HHTrE or PGE2 (20 ug/ml) for 24 h. Then fixed for immunofluorescent  
6 staining of CD86 (red) and Iba-1 (green). (B) The primary cultured neuron from C/EBP $\beta$  Tg  
7 mice, treated with 12-HHTrE or PGE2 (20 ug/ml) for 24 h. Then fixed for immunofluorescent  
8 staining of NeuN (red) and A $\beta$  (4G8, green). (C-D) Quantitative analysis of CD86/A $\beta$  mean IOD  
9 (n = 3 biologically independent samples in each group, data were shown as mean  $\pm$  SEM, one-  
10 way ANOVA and Bonferroni's multiple comparison test).

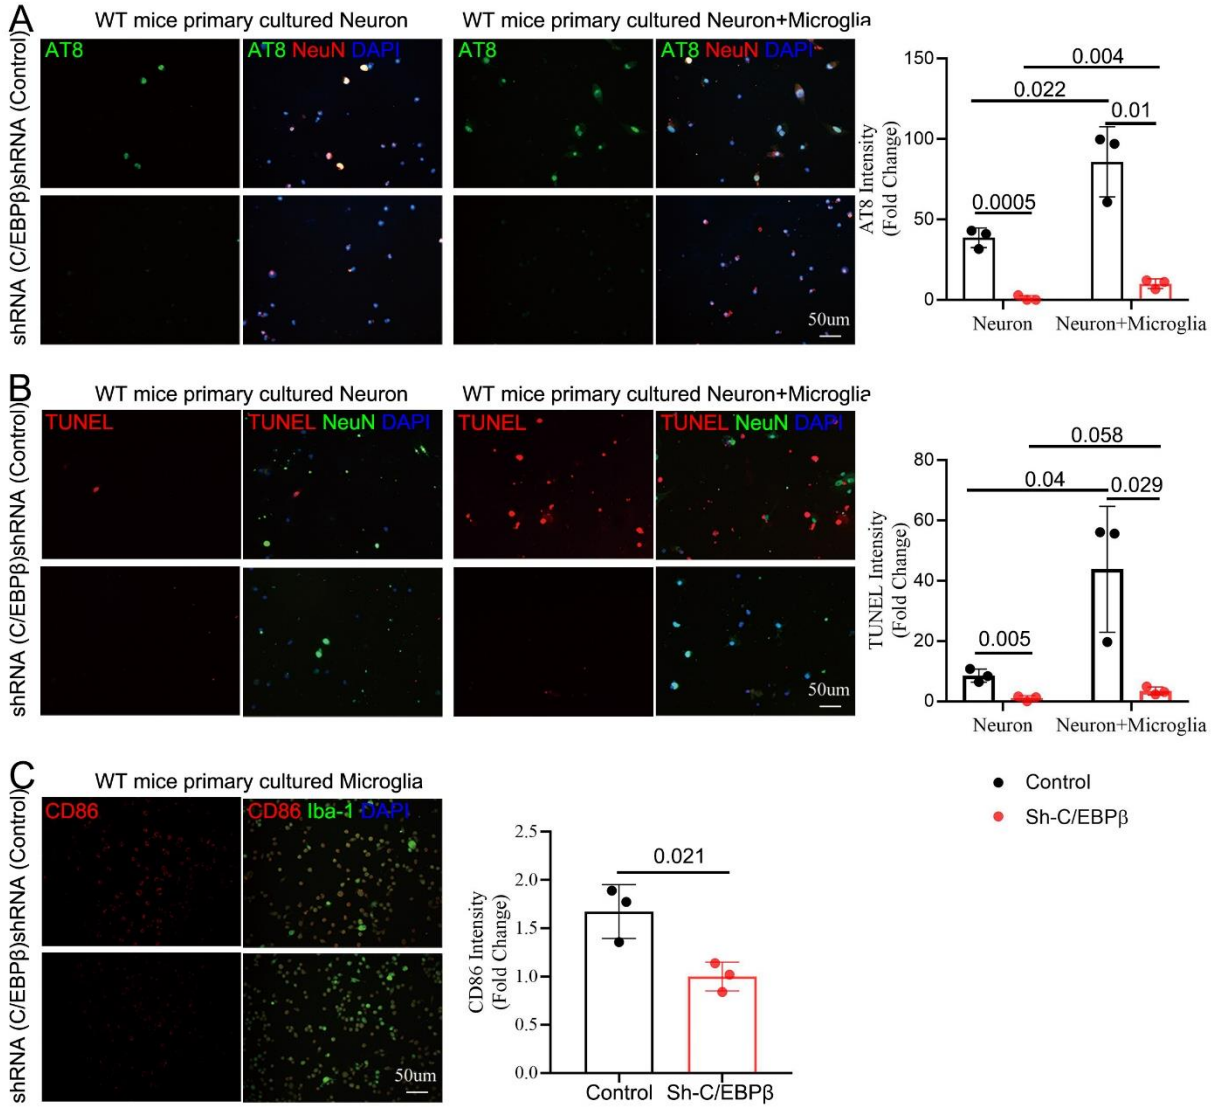

1 **Figure S11. Deletion of C/EBP $\beta$  from primary neuronal cultures or microglia alleviate the**  
2 **detrimental effect of *B. Fragilis* metabolites.**

3 The primary cultured neurons and neurons + microglia mixture from WT mice, followed w/wo  
4 AAV-sh-C/EBP $\beta$  knockdown, then treated with PGE2 (20 ug/ml) for 24 h. (A) Immunofluorescent  
5 staining of AT8 (green) and NeuN (red) in the primary cultured neurons or neurons + microglia  
6 mixture. Scale bar: 50  $\mu$ m. Quantitative analysis showed AT8 intensity was significantly decreased  
7 after C/EBP $\beta$  knockdown (n=3 biologically independent samples in each group, data were shown  
8 as mean  $\pm$  SEM, one-way ANOVA and Bonferroni's multiple comparison test). (B)  
9 Immunofluorescent staining of NeuN (green) and TUNEL (red) in the primary cultured neuron or  
10 neurons + microglia mixture. Scale bar: 50  $\mu$ m. Quantitative analysis showed TUNEL intensity  
11 was significantly decreased after C/EBP $\beta$  knockdown (n = 3 biologically independent samples in  
12 each group, data were shown as mean  $\pm$  SEM, one-way ANOVA and Bonferroni's multiple  
13 comparison test). (C) Immunofluorescent staining of Iba-1 (green) and CD86 (red) in the primary  
14 cultured microglia. Scale bar: 50  $\mu$ m. Quantitative analysis showed CD86 intensity was  
15 significantly decreased after C/EBP $\beta$  knockdown (n = 3 biologically independent samples in each  
16 group, data were shown as mean  $\pm$  SEM, two-tailed Student's t test).

**A**

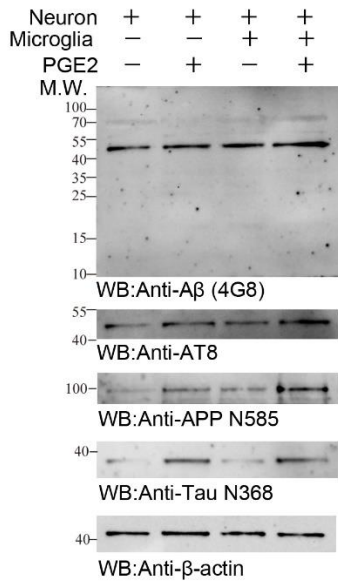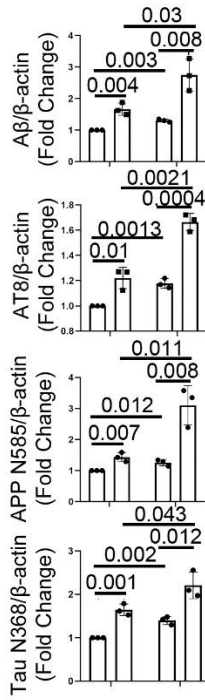

**B**

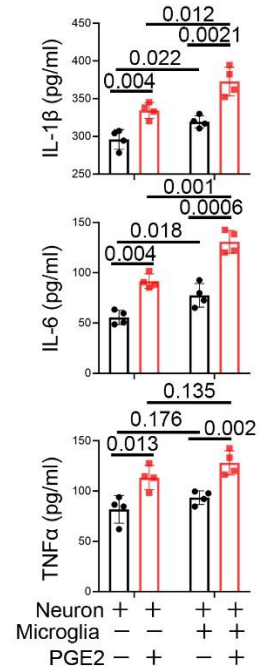

**C**

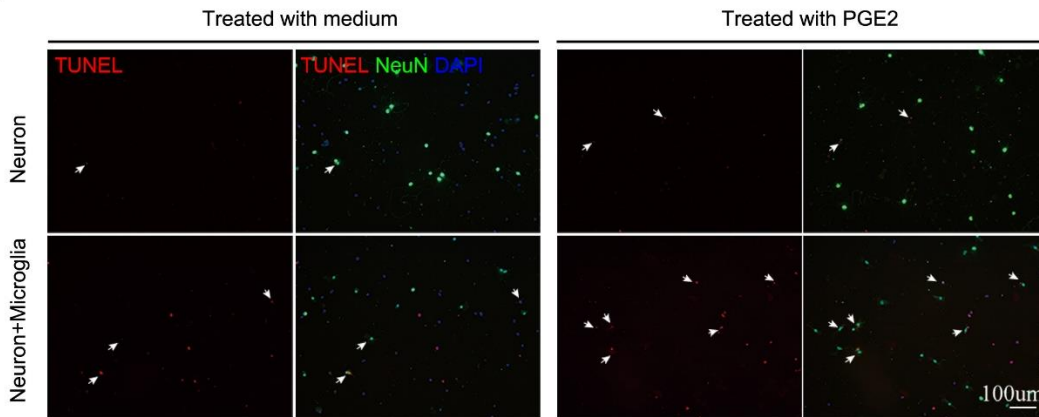

**D**

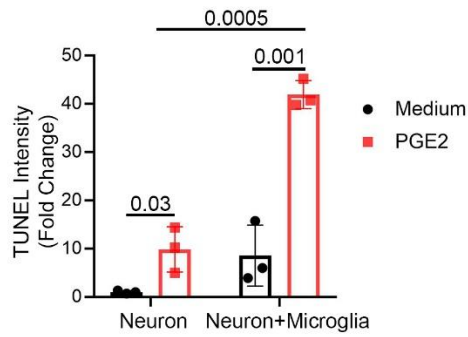

1 **Figure S12. Mixed cultures of neurons and microglia showed higher inflammatory**  
2 **cytokines, A $\beta$ <sub>42</sub>, AT8 levels, and apoptosis than neurons alone.**

3 The primary cultured neurons, mixed cultures of neurons + microglia from Thy1- C/EBP $\beta$  Tg mice.  
4 Treated w/wo PGE2. (A) WB detecting the protein levels of A $\beta$ , AT8, APP N585, and Tau N368.  
5 Quantitative analysis the protein fold changes between neurons, and mixed cultured neurons +  
6 microglia (n = 3 biologically independent samples in each group, data were shown as mean  $\pm$  SEM,  
7 one-way ANOVA and Bonferroni's multiple comparison test). (B) inflammatory cytokines  
8 including IL-1 $\beta$ , IL-6, and TNF- $\alpha$  were tested by ELISA (n = 3 biologically independent samples  
9 in each group, data were shown as mean  $\pm$  SEM, one-way ANOVA and Bonferroni's multiple  
10 comparison test). (C) Immunofluorescent staining of NeuN (green) and TUNEL (red) in the  
11 primary cultured neurons or neurons + microglia mixture. Scale bar: 100  $\mu$ m. Arrows showed the  
12 NeuN positive TUNEL deposited. (D) Quantitative analysis showed TUNEL intensity was  
13 significantly increased after PGE2 treatment or microglia addition (n = 3 biologically independent  
14 samples in each group, data were shown as mean  $\pm$  SEM, one-way ANOVA and Bonferroni's  
15 multiple comparison test).

A

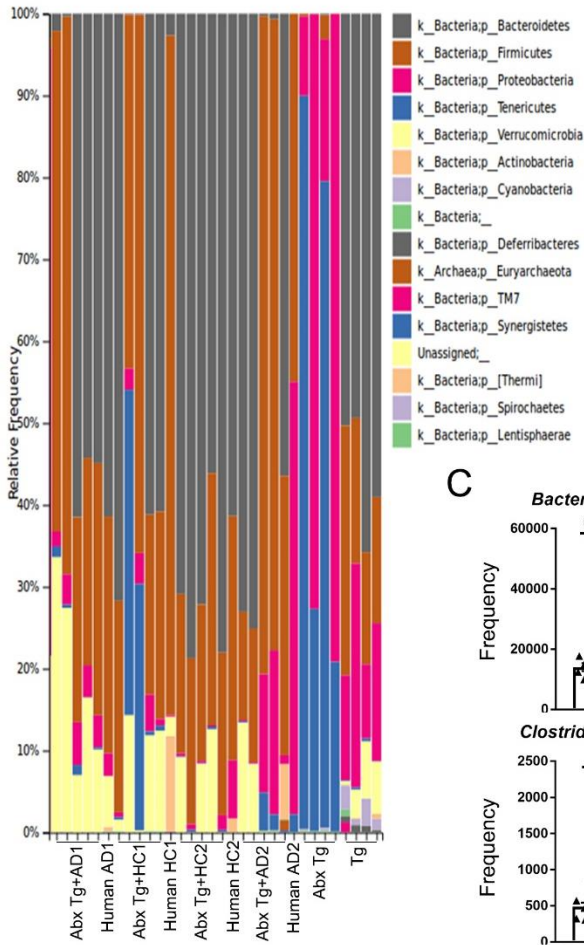

B

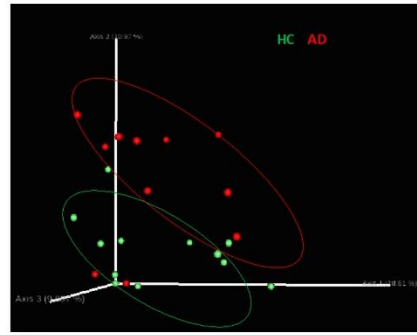

HC = HC donor and HC microbiota engraftment in Abx-treated Tg mice  
AD = AD donor and AD microbiota engraftment in Abx-treated Tg mice

C

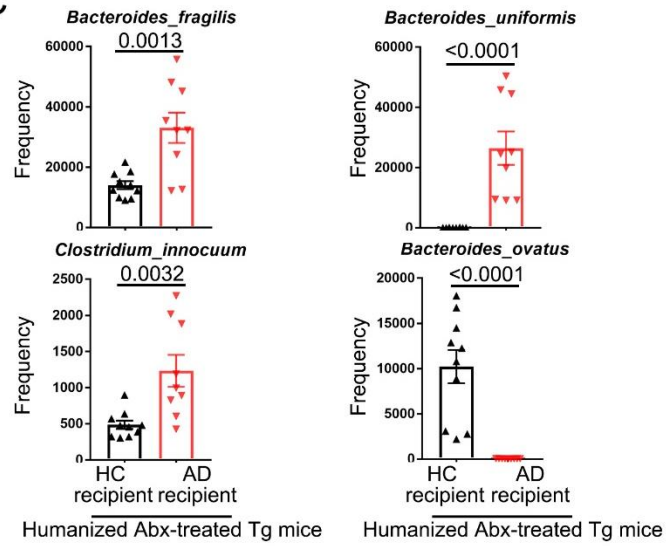

D

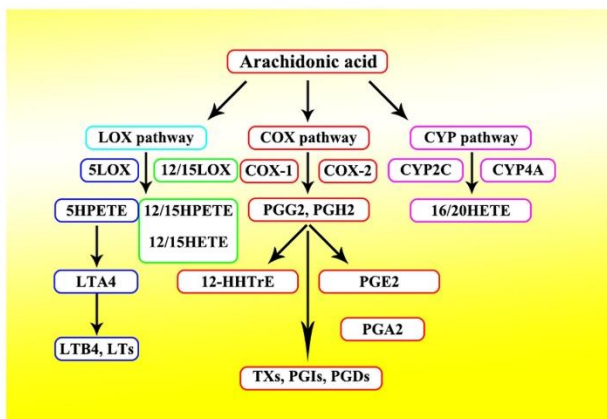

E

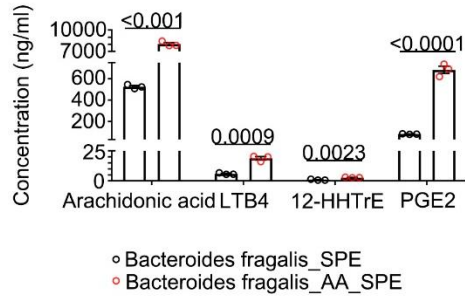



1 **Figure S13. Microbiome analysis of humanized Abx-treated WT and C/EBP $\beta$  Tg mice fecal**  
2 **samples, revealing Bacteroides elevation in the feces from human AD fecal inoculated Abx-**  
3 **treated mice.**

4 (A) Relative abundance of bacterial phyla determined by high throughput sequencing analysis.

5 (B) Principal coordinate plot (PcoA) of microbial community structure. (C) Mean frequency of

6 bacterial species. (n = 9-10 biologically independent samples in each group, data represent the

7 means  $\pm$  SEM, two-tailed Student's t test). (D) KEGG arachidonic acid metabolism pathway of

8 *Bacteroides fragilis* (1.11.1.9). (E) Concentrations of arachidonic acid (AA) and its metabolites

9 in culture medium from *in vitro* cultures of *Bacteroides fragilis* (n = 3 biologically independent

10 samples in each group, data were shown as mean  $\pm$  SEM, two-tailed Student's t test).

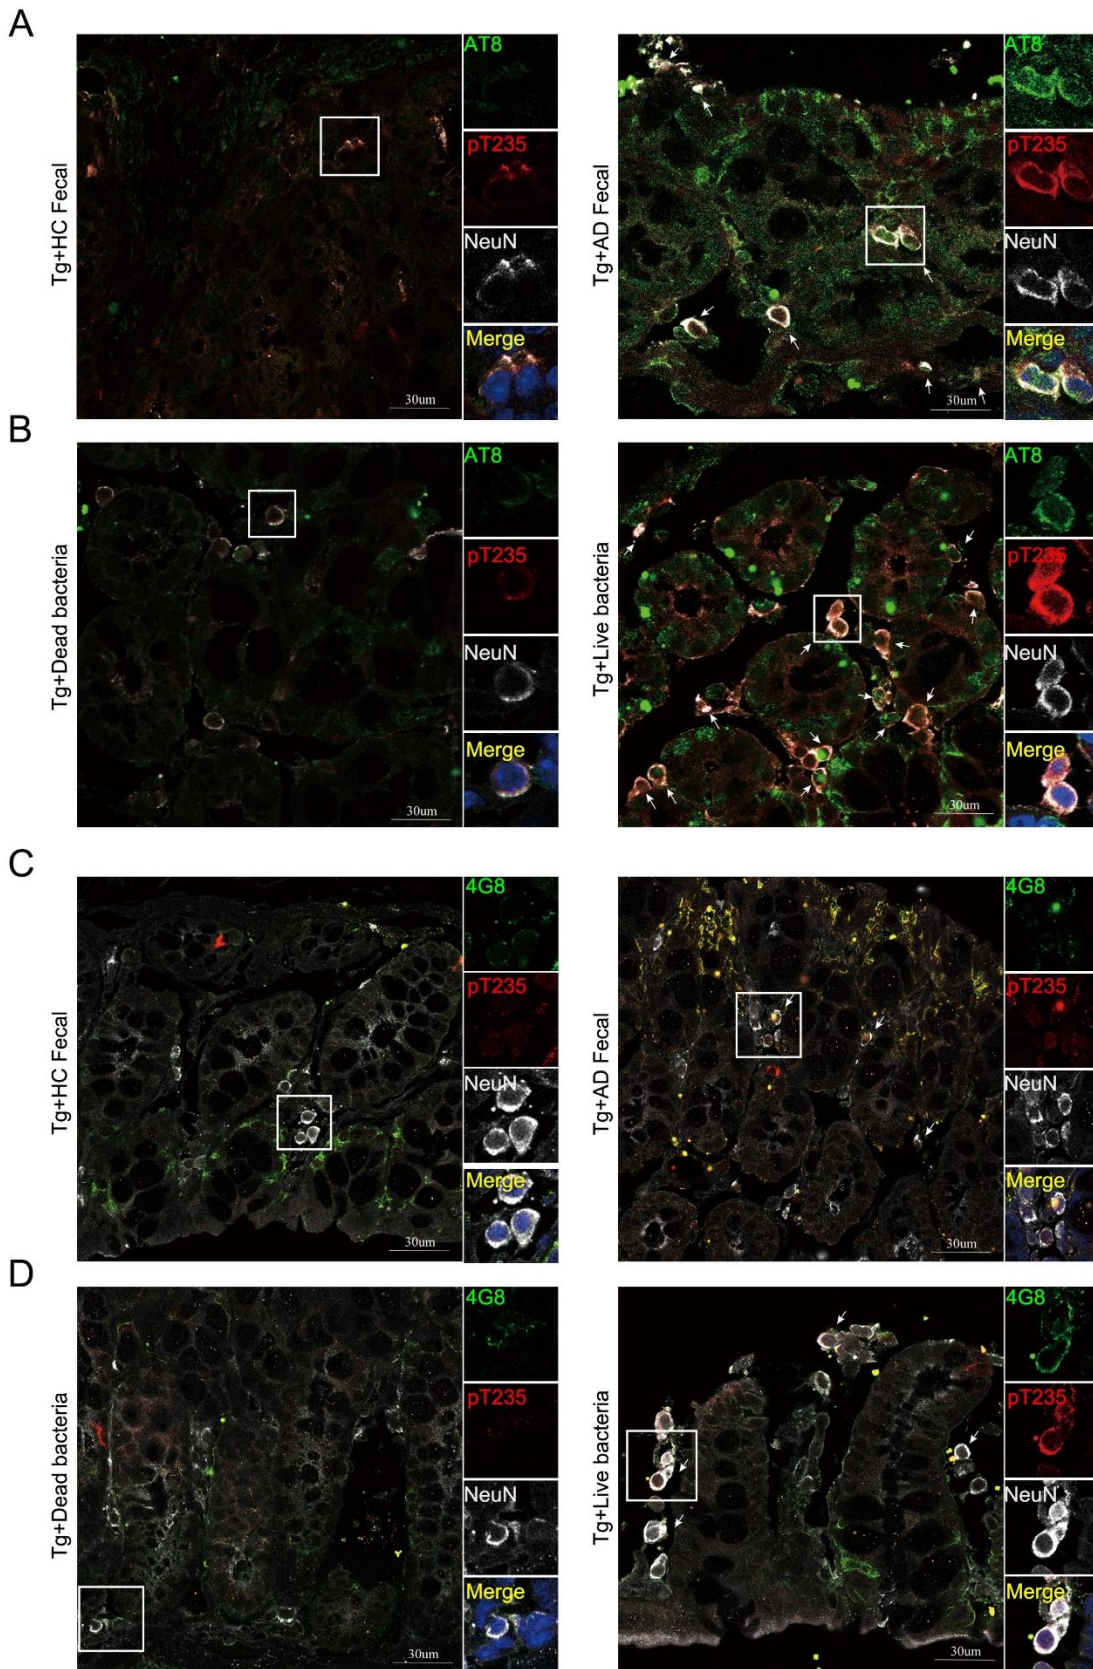

1 **Figure S14. The enteric neuronal A $\beta$ <sub>42</sub> and AT8 signals were increased after human AD**  
2 **fecal or live *B. fragilis* treatment.**

3 (A-B) Immunofluorescent staining of AT8 (green) and active C/EBP $\beta$  pT235 (red) in the  
4 intestine region of gut from human AD fecal or *B. Fragilis* treated C/EBP $\beta$  Tg mice  
5 (representative of 3 mice). Scale bar: 30  $\mu$ m. Arrows showed the AT8 and pT235 positive

6 neurons. (C-D) Immunofluorescent staining of A $\beta$  4G8 (green) and C/EBP $\beta$  pT235 (red) in the  
7 intestine region of gut from human AD fecal or *B. Fragilis* treated C/EBP $\beta$  Tg mice  
8 (representative of 3 mice). Scale bar: 30  $\mu$ m. Arrows showed the 4G8 and pT235 positive  
9 neurons.

# Lipid Metabolism

A

|                                                   |                                           | Welch's Two-Sample t-Test   |                |            |                |
|---------------------------------------------------|-------------------------------------------|-----------------------------|----------------|------------|----------------|
|                                                   |                                           | A:D-CERPs Tg<br>HC-CERPs Tg |                |            |                |
| Feces                                             |                                           | Colored by:                 |                |            |                |
| Sub Pathway                                       | Biochemical Name                          | Statistics                  | Fold of Change | Statistics | Fold of Change |
| Long Chain Saturated Fatty Acid                   | myristate (14:0)                          | 1.60                        | 1.60           |            |                |
|                                                   | palmitate (16:0)                          | 1.74                        | 1.74           |            |                |
|                                                   | stearate (18:0)                           | 1.59                        | 1.59           |            |                |
|                                                   | arachidate (20:0)                         | 1.64                        | 1.64           |            |                |
| Long Chain Monounsaturated Fatty Acid             | palmitoleate (16:1n7)                     | 1.79                        | 1.79           |            |                |
|                                                   | oleate/vaccenate (18:1)                   | 2.04                        | 2.04           |            |                |
|                                                   | eicosanoate (20:1)                        | 2.74                        | 2.74           |            |                |
|                                                   | erucate (22:1n9)                          | 2.02                        | 2.02           |            |                |
| Long Chain Polyunsaturated Fatty Acid (n3 and n6) | hexadecatrienoate (16:3n3)                | 1.58                        | 1.58           |            |                |
|                                                   | stearidonate (18:4n3)                     | 1.52                        | 1.52           |            |                |
|                                                   | eicosapentaenoate (EPA, 20:5n3)           | 2.17                        | 2.17           |            |                |
|                                                   | heneicosapentaenoate (21:5n3)             | 1.77                        | 1.77           |            |                |
|                                                   | docosapentaenoate (n3 EPA, 22:5n3)        | 2.31                        | 2.31           |            |                |
|                                                   | docosahexaenoate (DHA, 22:6n3)            | 2.23                        | 2.23           |            |                |
|                                                   | risinate (24:6n3)                         | 3.51                        | 3.51           |            |                |
|                                                   | hexadecadienoate (16:2n6)                 | 1.57                        | 1.57           |            |                |
|                                                   | linoleate (18:2n6)                        | 1.76                        | 1.76           |            |                |
|                                                   | linolenate (alpha or gamma, 18:3n3 or n6) | 1.75                        | 1.75           |            |                |
|                                                   | dihomo-linoleate (20:2n6)                 | 1.45                        | 1.45           |            |                |
|                                                   | dihomo-linolenate (20:3n3 or n6)          | 1.61                        | 1.61           |            |                |
|                                                   | arachidonate (20:4n6)                     | 2.27                        | 2.27           |            |                |
|                                                   | docosatrienoate (22:3n6)*                 | 0.65                        | 0.65           |            |                |
| adrenate (22:4n6)                                 | 1.72                                      | 1.72                        |                |            |                |
| docosapentaenoate (n6 EPA, 22:5n6)                | 1.44                                      | 1.44                        |                |            |                |
| docosadienoate (22:2n6)                           | 1.72                                      | 1.72                        |                |            |                |

|                  |                                           | Welch's Two-Sample t-Test   |                |            |                |
|------------------|-------------------------------------------|-----------------------------|----------------|------------|----------------|
|                  |                                           | A:D-CERPs Tg<br>HC-CERPs Tg |                |            |                |
| Feces            |                                           | Colored by:                 |                |            |                |
| Sub Pathway      | Biochemical Name                          | Statistics                  | Fold of Change | Statistics | Fold of Change |
| Monoacylglycerol | 1-myristoylglycerol (14:0)                | 1.68                        | 1.68           |            |                |
|                  | 1-palmitoylglycerol (16:0)                | 2.58                        | 2.58           |            |                |
|                  | 1-palmitoleoylglycerol (16:1)*            | 1.89                        | 1.89           |            |                |
|                  | 1-oleoylglycerol (18:1)                   | 2.43                        | 2.43           |            |                |
|                  | 1-linoleoylglycerol (18:2)                | 2.07                        | 2.07           |            |                |
|                  | 1-linolenoylglycerol (18:3)               | 1.92                        | 1.92           |            |                |
|                  | 1-dihomo-linolenoylglycerol (20:3)        | 2.58                        | 2.58           |            |                |
|                  | 1-docosahexaenoylglycerol (22:6)          | 1.91                        | 1.91           |            |                |
|                  | 2-myristoylglycerol (14:0)                | 1.35                        | 1.35           |            |                |
|                  | 2-palmitoylglycerol (16:0)                | 1.39                        | 1.39           |            |                |
|                  | 2-diacylglycerol (18:1)                   | 2.72                        | 2.72           |            |                |
|                  | 2-linoleoylglycerol (18:2)                | 1.47                        | 1.47           |            |                |
|                  | 2-docosahexaenoylglycerol (22:6)*         | 1.61                        | 1.61           |            |                |
|                  | 1-heptadecanoylglycerol (17:1)*           | 1.62                        | 1.62           |            |                |
| Diacylglycerol   | diacylglycerol (16:1/18:2 [2], 18:0/18:2) | 0.66                        | 0.66           |            |                |
|                  | palmitoyl-oleoylglycerol (16:0/18:1) [2]  | 0.62                        | 0.62           |            |                |
|                  | palmitoyl-linolenoylglycerol (16:0/18:2)  | 0.74                        | 0.74           |            |                |
|                  | palmitoyl-linoleoylglycerol (16:0/18:2)   | 0.64                        | 0.64           |            |                |
|                  | oleoyl-linoleoylglycerol (18:1/18:2) [2]  | 0.72                        | 0.72           |            |                |
|                  | linoleoyl-linoleoylglycerol (18:2/18:2)   | 0.78                        | 0.78           |            |                |
|                  | linoleoyl-linolenoylglycerol (18:2/18:3)  | 0.67                        | 0.67           |            |                |
|                  | linoleoyl-linolenoylglycerol (18:2/18:3)  | 0.72                        | 0.72           |            |                |
|                  | linoleoyl-linolenoylglycerol (18:2/18:3)  | 0.62                        | 0.62           |            |                |
|                  | linolenoyl-linolenoylglycerol (18:3/18:3) | 0.51                        | 0.51           |            |                |
|                  | linoleoyl-docosahexaenoylglycerol (1)     | 0.86                        | 0.86           |            |                |

B

|                                                   |                                           | Welch's Two-Sample t-Test |                |                             |                |
|---------------------------------------------------|-------------------------------------------|---------------------------|----------------|-----------------------------|----------------|
|                                                   |                                           | CERPs Tg<br>WT            |                | A:D-CERPs Tg<br>HC-CERPs Tg |                |
| Brain                                             |                                           | Colored by:               |                |                             |                |
| Sub Pathway                                       | Biochemical Name                          | Statistics                | Fold of Change | Statistics                  | Fold of Change |
| Long Chain Saturated Fatty Acid                   | myristate (14:0)                          | 0.98                      | 0.98           | 1.61                        | 1.61           |
|                                                   | palmitate (16:0)                          | 1.14                      | 1.14           | 1.77                        | 1.77           |
|                                                   | stearate (17:0)                           | 1.19                      | 1.19           | 2.00                        | 2.00           |
|                                                   | stearate (18:0)                           | 1.16                      | 1.16           | 1.66                        | 1.66           |
| Long Chain Monounsaturated Fatty Acid             | nonadecanoate (19:0)                      | 1.17                      | 1.17           | 2.25                        | 2.25           |
|                                                   | arachidate (20:0)                         | 1.26                      | 1.26           | 2.10                        | 2.10           |
|                                                   | palmitoleate (16:1n7)                     | 0.92                      | 0.92           | 2.00                        | 2.00           |
|                                                   | 10-heptadecanoate (17:1n7)                | 1.02                      | 1.02           | 2.36                        | 2.36           |
| Long Chain Polyunsaturated Fatty Acid             | oleate/vaccenate (18:1)                   | 1.15                      | 1.15           | 2.12                        | 2.12           |
|                                                   | 10-monodienoate (19:1n9)                  | 1.09                      | 1.09           | 2.74                        | 2.74           |
|                                                   | eicosanoate (20:1)                        | 1.20                      | 1.20           | 2.52                        | 2.52           |
|                                                   | erucate (22:1n9)                          | 1.27                      | 1.27           | 3.13                        | 3.13           |
| Long Chain Polyunsaturated Fatty Acid (n3 and n6) | tetradecatrienoate (14:2)*                | 0.93                      | 0.93           | 1.50                        | 1.50           |
|                                                   | hexadecatrienoate (16:3n3)                | 1.11                      | 1.11           | 1.62                        | 1.62           |
|                                                   | stearidonate (18:4n3)                     | 1.11                      | 1.11           | 1.58                        | 1.58           |
|                                                   | eicosapentaenoate (EPA, 20:5n3)           | 1.13                      | 1.13           | 2.10                        | 2.10           |
|                                                   | docosapentaenoate (n3 EPA, 22:5n3)        | 1.03                      | 1.03           | 2.68                        | 2.68           |
|                                                   | docosahexaenoate (DHA, 22:6n3)            | 1.18                      | 1.18           | 2.30                        | 2.30           |
|                                                   | docosatrienoate (22:3n3)                  | 1.78                      | 1.78           | 1.04                        | 1.04           |
|                                                   | risinate (24:6n3)                         | 1.27                      | 1.27           | 2.67                        | 2.67           |
|                                                   | hexadecadienoate (16:2n6)                 | 1.17                      | 1.17           | 1.55                        | 1.55           |
|                                                   | linoleate (18:2n6)                        | 1.34                      | 1.34           | 1.99                        | 1.99           |
|                                                   | linolenate (alpha or gamma, 18:3n3 or n6) | 1.06                      | 1.06           | 2.00                        | 2.00           |
|                                                   | dihomo-linoleate (20:2n6)                 | 1.50                      | 1.50           | 2.37                        | 2.37           |
|                                                   | dihomo-linolenate (20:3n3 or n6)          | 1.32                      | 1.32           | 2.10                        | 2.10           |
|                                                   | arachidonate (20:4n6)                     | 0.99                      | 0.99           | 1.01                        | 1.01           |
| docosatrienoate (22:3n6)*                         | 0.82                                      | 0.82                      | 3.32           | 3.32                        |                |
| adrenate (22:4n6)                                 | 1.12                                      | 1.12                      | 2.28           | 2.28                        |                |
| docosapentaenoate (n6 EPA, 22:5n6)                | 1.21                                      | 1.21                      | 2.35           | 2.35                        |                |
| docosadienoate (22:2n6)                           | 1.46                                      | 1.46                      | 3.01           | 3.01                        |                |
| mead acid (20:3n6)                                | 0.84                                      | 0.84                      | 2.21           | 2.21                        |                |

|                  |                                    | Welch's Two-Sample t-Test |                |                             |                |
|------------------|------------------------------------|---------------------------|----------------|-----------------------------|----------------|
|                  |                                    | CERPs Tg<br>WT            |                | A:D-CERPs Tg<br>HC-CERPs Tg |                |
| Brain            |                                    | Colored by:               |                |                             |                |
| Sub Pathway      | Biochemical Name                   | Statistics                | Fold of Change | Statistics                  | Fold of Change |
| Monoacylglycerol | 1-myristoylglycerol (14:0)         | 0.92                      | 0.92           | 1.42                        | 1.42           |
|                  | 1-palmitoylglycerol (16:0)         | 1.06                      | 1.06           | 2.06                        | 2.06           |
|                  | 1-palmitoleoylglycerol (16:1)*     | 0.86                      | 0.86           | 2.37                        | 2.37           |
|                  | 1-oleoylglycerol (18:1)            | 1.04                      | 1.04           | 1.67                        | 1.67           |
|                  | 1-linoleoylglycerol (18:2)         | 1.34                      | 1.34           | 2.53                        | 2.53           |
|                  | 1-dihomo-linolenoylglycerol (20:3) | 0.85                      | 0.85           | 2.78                        | 2.78           |
|                  | 1-arachidonylglycerol (20:4)       | 0.96                      | 0.96           | 2.10                        | 2.10           |
|                  | 1-docosahexaenoylglycerol (22:6)   | 1.00                      | 1.00           | 1.97                        | 1.97           |
|                  | 2-palmitoylglycerol (16:0)         | 1.03                      | 1.03           | 2.23                        | 2.23           |
|                  | 2-palmitoleoylglycerol (16:1)*     | 0.83                      | 0.83           | 2.46                        | 2.46           |
|                  | 2-oleoylglycerol (18:1)            | 0.90                      | 0.90           | 2.62                        | 2.62           |
|                  | 2-linoleoylglycerol (18:2)         | 1.32                      | 1.32           | 2.47                        | 2.47           |
|                  | 2-arachidonylglycerol (20:4)       | 0.97                      | 0.97           | 1.93                        | 1.93           |
|                  | 2-docosahexaenoylglycerol (22:6)*  | 0.93                      | 0.93           | 1.84                        | 1.84           |

1 **Figure S15. Metabolomics analysis of the brains, serum and feces samples from HC or AD**  
2 **humanized Abx-treated C/EBP $\beta$  Tg mice and the brains from WT and C/EBP $\beta$  Tg mice.**  
3 (A-B) The differences in microbiomes related metabolites from feces samples (A) and brain  
4 lysates (B). Red and green shaded cells indicate  $p \leq 0.05$  (red indicates the fold change values are  
5 significantly higher for that comparison; green values significantly lower). Light red and light  
6 green shaded cells indicate  $0.05 < p < 0.10$  (light red indicates the fold change values trend higher  
7 for that comparison; light green values trend lower). Source data are provided as Supplementary  
8 Data 1.



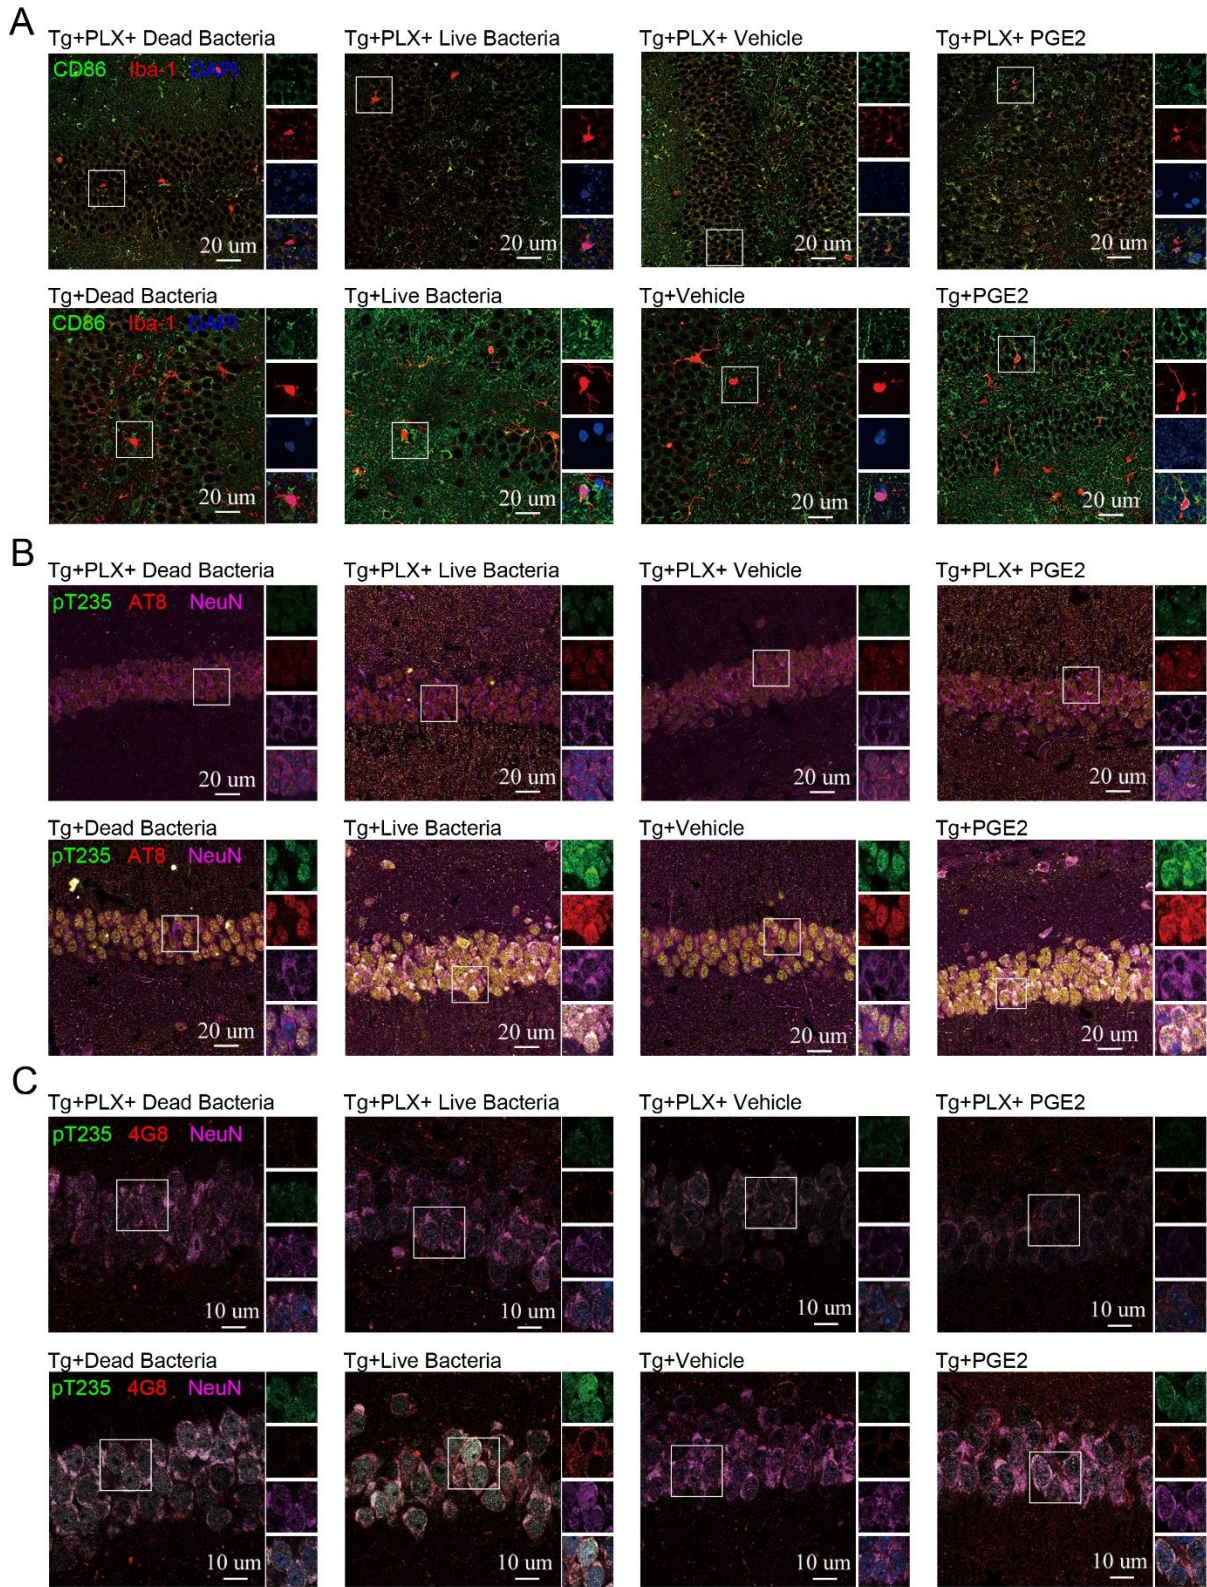



1 **Figure S16. Deletion of microglia attenuated PGE2-induced AD pathologies in Thy1-**  
2 **C/EBP $\beta$  Tg mice.**  
3 3-month-old Thy1-C/EBP $\beta$  Tg mice feed w/wo PLX3397 (600 ppm in chow, 7 days), followed by  
4 bacteria/PGE2 treatment (Tg + B.F (Dead), Tg + B.F (Live), Tg + Vehicle, Tg + PGE2) for 8  
5 weeks, n = 3/group. (A) Immunofluorescent staining of CD86 (green) and Iba-1 (red) in the  
6 hippocampus region of the brain from *B. fragilis* or PGE2 treated C/EBP $\beta$  Tg mice. Scale bar: 20  
7  $\mu$ m. (B) Immunofluorescent staining of pT235 (green) and AT8 (red) in the hippocampus region  
8 of the brain from *B. fragilis* or PGE2 treated C/EBP $\beta$  Tg mice. Scale bar: 20  $\mu$ m. (C)  
9 Immunofluorescent staining of pT235 (green) and 4G8 (red) in the hippocampus region of the  
10 brain from *B. fragilis* or PGE2 treated C/EBP $\beta$  Tg mice. Scale bar: 20  $\mu$ m.
